# Supplementary material for: Identification of Key Genes Associated With the Process of Hepatitis B Inflammation and Cancer Transformation by Integrated Bioinformatics Analysis
Source: Front Genet. 2021 Sep 1;12:654517. doi: 10.3389/fgene.2021.654517 (PMC8440810; doi:10.3389/fgene.2021.654517)
Supplement: Supplementary file 1 [file Data_Sheet_1.ZIP]

Archive with 19 entries (16 files):
- R /
- R /step-2-diffExp.R
- __MACOSX/
- __MACOSX/R /
- __MACOSX/R /._step-2-diffExp.R
- R /GO_KEGG.R
- __MACOSX/R /._GO_KEGG.R
- R /icgc-project.R
- __MACOSX/R /._icgc-project.R
- R /.DS_Store
- __MACOSX/R /._.DS_Store
- R /clinical.R
- __MACOSX/R /._clinical.R
- R /pheatmap.R
- __MACOSX/R /._pheatmap.R
- R /step-1-getExprs.R
- __MACOSX/R /._step-1-getExprs.R
- R /volcano.R
- __MACOSX/R /._volcano.R
