# Supplementary material for: Identification of Key Genes Associated With the Process of Hepatitis B Inflammation and Cancer Transformation by Integrated Bioinformatics Analysis
Source: Front Genet. 2021 Sep 1;12:654517. doi: 10.3389/fgene.2021.654517 (PMC8440810; doi:10.3389/fgene.2021.654517)
Supplement: Supplementary Table 2 — The results of the differential analysis of the GSE121248 data set. [file Table_2.XLSX]

## Sheet: diffTab_GSE121248_logFCcutoff_1
id	logFC	AveExpr	t	P.Value	adj.P.Val	B	change
CXCL14	-4.01281	7.24009	-17.383	5.48266e-33	1.10607e-28	64.2486	down
ANGPTL6	-1.70028	7.40752	-16.6695	1.4777e-31	7.9855e-28	61.0404	down
VIPR1	-1.40339	7.59019	-16.6615	1.53358e-31	7.9855e-28	61.0042	down
IGFALS	-2.08697	7.08323	-16.6547	1.58332e-31	7.9855e-28	60.9731	down
CLEC1B	-3.16985	7.21487	-16.1494	1.69808e-30	6.8514e-27	58.6591	down
HHIP	-2.84283	6.49802	-15.5602	2.80967e-29	9.44706e-26	55.919	down
CDHR2	-2.48948	8.28253	-15.3629	7.26097e-29	2.09261e-25	54.9912	down
ECM1	-1.71829	7.87604	-15.1049	2.52999e-28	6.38e-25	53.7708	down
KCNN2	-4.03311	6.62617	-14.9737	4.78773e-28	1.0732e-24	53.147	down
ADAMTS13	-1.67102	7.57845	-14.7331	1.54984e-27	3.12665e-24	51.9977	down
OIT3	-3.27895	6.97397	-14.5473	3.85862e-27	7.07671e-24	51.105	down
FCN2	-3.67975	6.7064	-14.4062	7.73149e-27	1.29979e-23	50.4246	down
CLEC4M	-2.90553	6.68499	-14.3504	1.01828e-26	1.58021e-23	50.1549	down
CLEC4G	-3.20472	7.00973	-14.2883	1.3841e-26	1.99449e-23	49.8544	down
PLVAP	1.3258	7.54145	14.1624	2.58323e-26	3.47427e-23	49.2432	up
ZGPAT	-2.22408	9.654	-14.1081	3.38281e-26	4.2653e-23	48.9791	down
CAP2	2.4624	8.26873	14.08	3.88941e-26	4.61559e-23	48.8424	up
STAB2	-1.71759	6.21671	-13.7147	2.40745e-25	2.69821e-22	47.0561	down
CRHBP	-3.03987	6.91394	-13.631	3.66156e-25	3.8878e-22	46.6451	down
LINC01093	-4.19988	7.64569	-13.5585	5.27212e-25	5.31799e-22	46.2877	down
CYP26A1	-2.75074	7.01852	-13.5408	5.76037e-25	5.5338e-22	46.2009	down
ACADS	-1.34049	8.47308	-13.5145	6.57706e-25	6.03117e-22	46.0709	down
ANKRD55	-1.14809	4.65244	-13.4779	7.90509e-25	6.93379e-22	45.8905	down
KDM8	-1.92801	7.73694	-13.3426	1.56322e-24	1.31402e-21	45.2219	down
PAMR1	-1.1369	6.89691	-13.2	3.21411e-24	2.59366e-21	44.515	down
COLEC10	-1.26487	5.9562	-13.1018	5.28553e-24	4.01278e-21	44.027	down
TOP2A	3.26661	7.04802	13.0986	5.37052e-24	4.01278e-21	44.0114	up
PTH1R	-1.31329	6.99427	-13.0651	6.36576e-24	4.58653e-21	43.8446	down
NXF3	-1.08279	5.37003	-12.9836	9.62706e-24	6.69712e-21	43.4388	down
FCN3	-3.34854	8.63504	-12.8525	1.87544e-23	1.26117e-20	42.7845	down
RIPOR3	-2.52175	7.10667	-12.8158	2.26187e-23	1.47197e-20	42.6006	down
DBH	-1.01379	6.34332	-12.7482	3.19224e-23	2.0125e-20	42.2625	down
LCAT	-2.54752	8.88313	-12.691	4.2739e-23	2.61278e-20	41.9761	down
CNDP1	-3.76002	7.93055	-12.6495	5.28466e-23	3.13567e-20	41.7677	down
RACGAP1	2.01133	7.47505	12.6142	6.32937e-23	3.64825e-20	41.5907	up
ASPM	2.86393	6.63522	12.3796	2.10509e-22	1.17967e-19	40.4109	up
CCBE1	-1.79177	5.84188	-12.3352	2.6438e-22	1.44151e-19	40.1872	down
RSPO3	-1.93617	5.98534	-12.3223	2.82418e-22	1.49934e-19	40.1224	down
BMPER	-1.23169	3.95093	-12.3164	2.91192e-22	1.50628e-19	40.0924	down
ADGRG7	-2.26206	6.31568	-12.1689	6.21494e-22	3.13451e-19	39.3479	down
IDO2	-3.34742	6.97374	-12.1189	8.04252e-22	3.95731e-19	39.0948	down
COL15A1	3.00136	6.84131	12.0926	9.21069e-22	4.4242e-19	38.9616	up
PLAC8	-2.11345	6.88806	-11.9842	1.61024e-21	7.55467e-19	38.413	down
CFP	-1.66904	7.2766	-11.9676	1.75489e-21	8.04616e-19	38.3285	down
CSRNP1	-1.51174	8.18237	-11.8882	2.64378e-21	1.18523e-18	37.926	down
PSMD4	1.00698	10.7913	11.7718	4.82657e-21	2.11677e-18	37.3347	up
HMMR	2.22706	6.97964	11.7553	5.25749e-21	2.25669e-18	37.2507	up
PITPNM3	-1.36889	4.75488	-11.6945	7.203e-21	2.96558e-18	36.9414	down
TBXA2R	-1.11351	7.34655	-11.5965	1.19716e-20	4.73557e-18	36.4423	down
SLITRK6	-1.26315	5.10953	-11.5924	1.22271e-20	4.74363e-18	36.4216	down
CLTRN	-3.45568	7.36212	-11.5507	1.5176e-20	5.77661e-18	36.2093	down
TTC36	-2.96751	9.12617	-11.5198	1.78178e-20	6.65659e-18	36.0516	down
MSH2	1.45276	6.5529	11.4626	2.39782e-20	8.79521e-18	35.7598	up
MAP2K1	-1.01636	9.04653	-11.3377	4.58774e-20	1.62374e-17	35.1223	down
CDC37L1	-1.34905	9.08663	-11.3204	5.01974e-20	1.746e-17	35.0339	down
FAHD2A	-1.08596	9.20666	-11.2742	6.38395e-20	2.16285e-17	34.7977	down
NUSAP1	1.87562	8.15386	11.2727	6.43258e-20	2.16285e-17	34.7902	up
TCTEX1D1	-1.44741	4.34833	-11.2057	9.11749e-20	2.96671e-17	34.4474	down
EPHA2	-1.46543	7.70984	-11.1892	9.93428e-20	3.18118e-17	34.3631	down
PZP	-1.60189	7.51241	-11.1792	1.04655e-19	3.29893e-17	34.3119	down
CDKN3	2.00452	6.80927	11.1213	1.4146e-19	4.3905e-17	34.0158	up
EZH2	1.65504	6.68062	11.1141	1.46843e-19	4.4885e-17	33.9791	up
PRC1	2.10025	6.97213	11.1111	1.49191e-19	4.49221e-17	33.9635	up
ECT2	2.05883	6.43369	11.0895	1.66966e-19	4.95347e-17	33.8529	up
CYP1A2	-3.37066	11.0544	-11.0767	1.78403e-19	5.2161e-17	33.7878	down
HAND2-AS1	-1.41538	5.55461	-11.0553	1.99456e-19	5.74833e-17	33.6782	down
LIFR	-2.44975	8.24752	-11.0472	2.08094e-19	5.91279e-17	33.6365	down
ANLN	2.51304	5.83054	11.0329	2.24192e-19	6.28175e-17	33.5633	up
CENPW	1.66097	7.47368	10.9556	3.35404e-19	9.2691e-17	33.1674	up
GPR146	-1.11201	6.62636	-10.948	3.4893e-19	9.51258e-17	33.1285	down
MASP1	-1.83905	8.54833	-10.9235	3.96638e-19	1.0669e-16	33.0026	down
SHBG	-1.30328	7.3383	-10.8963	4.56992e-19	1.21307e-16	32.8634	down
CETP	-1.95149	6.90823	-10.8606	5.505e-19	1.44231e-16	32.6804	down
SRPX	-2.86257	6.93926	-10.8282	6.51935e-19	1.65715e-16	32.5142	down
SLC25A47	-2.21191	9.14894	-10.8267	6.57144e-19	1.65715e-16	32.5064	down
OLFML3	-2.03909	7.27301	-10.7351	1.0602e-18	2.62612e-16	32.0363	down
ITGA6	1.32983	8.46054	10.6926	1.32319e-18	3.21614e-16	31.8185	up
HGFAC	-2.87034	7.99706	-10.6885	1.35183e-18	3.24664e-16	31.7975	down
UROC1	-1.20083	5.97374	-10.636	1.77797e-18	4.21986e-16	31.5282	down
TBC1D16	1.06509	7.40931	10.6086	2.05193e-18	4.81345e-16	31.3873	up
NEK2	2.3324	6.70193	10.5907	2.25362e-18	5.16643e-16	31.2952	up
LYVE1	-1.53822	6.61163	-10.5871	2.29559e-18	5.20351e-16	31.277	down
DTL	2.21595	6.76712	10.5554	2.70992e-18	6.00769e-16	31.1139	up
MSRA	-1.32293	9.15869	-10.5448	2.86374e-18	6.27969e-16	31.0597	down
RRM2	2.24717	7.97872	10.5264	3.15324e-18	6.69616e-16	30.965	up
HGF	-2.77891	6.71221	-10.5078	3.47496e-18	7.22721e-16	30.8695	down
GGTLC1	-1.04947	7.53868	-10.5025	3.57199e-18	7.35319e-16	30.8425	down
NGFR	-1.00731	6.49271	-10.4852	3.90932e-18	7.96633e-16	30.7538	down
ENO3	-2.22449	8.452	-10.4819	3.97745e-18	8.02411e-16	30.7368	down
GJC1	1.52593	6.02117	10.444	4.85027e-18	9.68805e-16	30.5418	up
IGFBP3	-2.04611	11.4813	-10.4398	4.95749e-18	9.77928e-16	30.5203	down
KAZN	-1.65219	7.1168	-10.4384	4.99289e-18	9.77928e-16	30.5133	down
RCAN1	-1.65162	10.5851	-10.4229	5.41593e-18	1.04013e-15	30.4334	down
RND3	-1.85481	9.95705	-10.4205	5.48248e-18	1.04013e-15	30.4214	down
NDC80	1.81936	5.86084	10.4203	5.48793e-18	1.04013e-15	30.4204	up
NAT2	-2.52333	8.68345	-10.4176	5.56826e-18	1.04013e-15	30.4061	down
ASS1	-1.53442	12.3098	-10.3576	7.61863e-18	1.41008e-15	30.098	down
MRO	-1.49278	6.50065	-10.3419	8.27115e-18	1.51693e-15	30.0172	down
BUB1B	2.0674	7.01177	10.3386	8.41188e-18	1.52884e-15	30.0006	up
IRAK1	1.09206	9.4067	10.3199	9.27558e-18	1.67076e-15	29.9046	up
TPPP2	-1.39279	6.21116	-10.2882	1.09495e-17	1.95483e-15	29.7415	down
ZBED8	1.13772	4.71943	10.2809	1.13778e-17	2.01347e-15	29.7038	up
FANCC	-1.04902	7.7812	-10.2775	1.15815e-17	2.02801e-15	29.6863	down
CPEB3	-1.75898	7.20723	-10.2762	1.1661e-17	2.02801e-15	29.6796	down
CKAP2	1.40145	6.11435	10.2418	1.39523e-17	2.38537e-15	29.5033	up
HAMP	-4.13768	10.1213	-10.2373	1.4285e-17	2.42172e-15	29.4801	down
ZG16	-2.17879	8.55678	-10.2235	1.53577e-17	2.56054e-15	29.409	down
STMN1	1.28593	7.45377	10.2218	1.54941e-17	2.56211e-15	29.4003	up
PLPP3	-1.05159	10.6262	-10.1811	1.91681e-17	3.11852e-15	29.1911	down
TDRKH	1.37441	5.89942	10.1782	1.9456e-17	3.14004e-15	29.1765	up
RFX5	1.10872	8.29497	10.1758	1.97077e-17	3.15543e-15	29.1638	up
SSR2	1.04154	11.0751	10.147	2.29043e-17	3.58195e-15	29.0161	up
SRD5A2	-2.06404	7.78991	-10.1426	2.34355e-17	3.60702e-15	28.9936	down
FLVCR1	1.33857	8.67392	10.1417	2.3551e-17	3.60702e-15	28.9887	up
NOCT	-1.50977	5.99365	-10.1413	2.3601e-17	3.60702e-15	28.9867	down
UBE2T	1.68617	6.97266	10.115	2.70757e-17	4.10695e-15	28.8517	up
BDH2	-1.46599	10.0297	-10.0991	2.94185e-17	4.38311e-15	28.7701	down
IGHM	-2.32053	8.33304	-10.0983	2.9548e-17	4.38311e-15	28.7658	down
FAM13A	-1.93122	9.87106	-10.0871	3.13323e-17	4.61385e-15	28.7082	down
JDP2	-1.34801	7.34769	-10.0827	3.20547e-17	4.68603e-15	28.6857	down
CD5L	-2.10328	7.41654	-10.0737	3.36042e-17	4.84237e-15	28.6393	down
CCNB1	2.06329	6.97454	10.055	3.70595e-17	5.26506e-15	28.5432	up
AADAT	-1.7499	7.37763	-10.0111	4.6626e-17	6.53217e-15	28.3175	down
CXCL12	-2.79148	9.26165	-9.98553	5.32792e-17	7.31194e-15	28.1864	down
GSTZ1	-1.82527	9.4671	-9.9777	5.55063e-17	7.56611e-15	28.1461	down
SIGIRR	-1.46654	9.4283	-9.91654	7.64147e-17	1.02773e-14	27.8319	down
ESM1	1.72677	6.10492	9.90348	8.18119e-17	1.07874e-14	27.7649	up
CLRN3	-3.16318	7.74219	-9.90219	8.23626e-17	1.07895e-14	27.7583	down
KANK4	-2.25255	6.33281	-9.8975	8.44076e-17	1.09861e-14	27.7342	down
CDK1	2.04642	7.15187	9.88317	9.09701e-17	1.15937e-14	27.6606	up
FOXO1	-1.10983	8.80695	-9.881	9.20122e-17	1.16016e-14	27.6494	down
MARCO	-1.72872	7.44241	-9.87412	9.53773e-17	1.18045e-14	27.6141	down
TRIB1	-1.20634	11.6483	-9.86684	9.90774e-17	1.21877e-14	27.5767	down
CCDC34	1.42453	6.55318	9.86057	1.02374e-16	1.25169e-14	27.5445	up
SLC28A1	-1.1263	7.25528	-9.84922	1.0863e-16	1.32018e-14	27.4862	down
PODXL	1.32607	8.14962	9.84473	1.11213e-16	1.34349e-14	27.4631	up
ILF2	1.12739	9.55099	9.83827	1.15032e-16	1.37316e-14	27.4299	up
SLC9B2	-1.37023	8.08422	-9.81667	1.28775e-16	1.51563e-14	27.319	down
FEZ1	-1.28351	7.32965	-9.80928	1.33842e-16	1.56077e-14	27.2811	down
GINS1	1.93963	6.77345	9.77916	1.56646e-16	1.80582e-14	27.1265	up
DNMT3L	-1.38738	7.26806	-9.77786	1.57714e-16	1.80779e-14	27.1198	down
RAD51AP1	1.6543	6.07461	9.7597	1.73409e-16	1.96654e-14	27.0266	up
PBK	2.24164	5.97886	9.75759	1.75335e-16	1.9761e-14	27.0157	up
PDE7B	-1.18395	6.87966	-9.74463	1.87617e-16	2.07966e-14	26.9492	down
CENPF	1.71073	7.20773	9.72613	2.06642e-16	2.26566e-14	26.8543	up
NPY1R	-1.70886	5.31534	-9.72137	2.11852e-16	2.31021e-14	26.8298	down
MELK	1.48285	7.36122	9.71414	2.20005e-16	2.38623e-14	26.7927	up
LRRN3	-1.01429	5.52212	-9.68839	2.51669e-16	2.71506e-14	26.6605	down
FRMD4B	-1.15261	8.74574	-9.68527	2.558e-16	2.74495e-14	26.6445	down
CCNB2	1.78052	7.14203	9.68223	2.59891e-16	2.77409e-14	26.6289	up
UHRF1	1.87747	6.41604	9.6709	2.75738e-16	2.92776e-14	26.5708	up
GPD1	-1.77697	8.35364	-9.66843	2.79318e-16	2.948e-14	26.5581	down
PHGDH	-1.54969	8.43669	-9.66447	2.85147e-16	2.95003e-14	26.5378	down
CCT3	1.01301	10.969	9.65688	2.96674e-16	3.05363e-14	26.4989	up
PALM3	-1.46359	8.01528	-9.60573	3.87489e-16	3.92824e-14	26.2364	down
CENPU	1.82824	6.63095	9.57399	4.573e-16	4.54461e-14	26.0737	up
PTTG1	1.49177	8.53151	9.56597	4.76842e-16	4.69552e-14	26.0325	up
STEAP3	-1.53565	9.39771	-9.56585	4.7714e-16	4.69552e-14	26.0319	down
SPRYD4	-1.13841	8.38589	-9.56376	4.82356e-16	4.72381e-14	26.0212	down
SYNE1	-1.04361	8.26713	-9.53287	5.66734e-16	5.44443e-14	25.8628	down
SLC19A3	-1.29018	6.75754	-9.51127	6.34342e-16	6.03642e-14	25.7521	down
GDPD1	1.58519	5.54865	9.49884	6.76808e-16	6.38034e-14	25.6884	up
KIF20A	1.90481	6.57883	9.48482	7.28174e-16	6.83264e-14	25.6165	up
FAM83D	1.9319	7.01995	9.47204	7.78343e-16	7.20288e-14	25.5511	up
CDH19	-2.20115	5.81369	-9.45281	8.6045e-16	7.89033e-14	25.4525	down
LY6E	-1.44457	8.21564	-9.45123	8.67563e-16	7.91956e-14	25.4444	down
BCO2	-2.37504	8.12976	-9.42719	9.83423e-16	8.81759e-14	25.3213	down
NCAPG	1.84386	6.55314	9.41016	1.07471e-15	9.50928e-14	25.234	up
PCDH9	-1.9034	6.40633	-9.40785	1.08773e-15	9.5825e-14	25.2222	down
BBOX1	-3.34013	7.60763	-9.4048	1.10517e-15	9.61921e-14	25.2066	down
BIRC5	1.65847	6.83877	9.40462	1.1062e-15	9.61921e-14	25.2057	up
DNASE1L3	-2.25636	9.01392	-9.38781	1.2075e-15	1.04103e-13	25.1196	down
CHST4	-1.2604	5.70687	-9.36475	1.36169e-15	1.16897e-13	25.0015	down
SFRP1	-1.1557	5.70357	-9.3471	1.49288e-15	1.27078e-13	24.9111	down
GPC3	3.87621	9.15177	9.34083	1.54245e-15	1.30198e-13	24.879	up
SGO2	1.46709	6.68254	9.32838	1.64583e-15	1.38346e-13	24.8153	up
MAD2L1	1.80544	6.48646	9.30262	1.88214e-15	1.57553e-13	24.6835	up
DIRAS3	-1.84103	5.68149	-9.29613	1.94683e-15	1.61627e-13	24.6503	down
DNAJC6	1.87265	6.2722	9.29231	1.98596e-15	1.6412e-13	24.6307	up
RFC4	1.16255	7.67134	9.27247	2.20202e-15	1.79127e-13	24.5293	up
ESR1	-2.32809	7.60189	-9.26255	2.3188e-15	1.86372e-13	24.4785	down
KPNA2	1.16023	10.3585	9.25892	2.36295e-15	1.89167e-13	24.46	up
C3orf85	-2.76894	7.26018	-9.25614	2.39743e-15	1.91169e-13	24.4457	down
KMO	-2.14701	8.75276	-9.25344	2.43137e-15	1.93112e-13	24.4319	down
TCF21	-1.06056	5.80872	-9.25166	2.45397e-15	1.94143e-13	24.4228	down
KIF4A	1.73154	6.26878	9.24538	2.53559e-15	1.99039e-13	24.3907	up
FOSB	-2.46366	8.49616	-9.23041	2.74105e-15	2.12684e-13	24.3142	down
TAF1A	1.11189	5.45777	9.21679	2.94228e-15	2.26556e-13	24.2446	up
COL4A1	1.50518	10.2021	9.20903	3.06364e-15	2.34113e-13	24.2048	up
ASPA	-1.96584	6.90393	-9.20218	3.17466e-15	2.40773e-13	24.1699	down
RAB26	-1.52855	8.08637	-9.17893	3.58283e-15	2.67704e-13	24.0511	down
CDKN2C	1.3536	7.71722	9.11773	4.92536e-15	3.57425e-13	23.7384	up
LPA	-2.4278	7.86576	-9.10899	5.15419e-15	3.7269e-13	23.6938	down
PLIN1	-1.31608	7.54843	-9.10421	5.2838e-15	3.79343e-13	23.6694	down
ALDH1B1	-1.21831	7.74226	-9.10155	5.35742e-15	3.83264e-13	23.6558	down
ZWINT	1.7092	7.68341	9.08117	5.95596e-15	4.21599e-13	23.5518	up
TCIM	-1.72085	9.85311	-9.05052	6.98396e-15	4.85843e-13	23.3954	down
SPRY2	-1.02311	7.52833	-9.0446	7.20185e-15	4.97569e-13	23.3652	down
MOGAT2	-1.96957	8.58771	-9.04072	7.34866e-15	5.05979e-13	23.3454	down
STIL	1.1565	6.16575	9.01054	8.59514e-15	5.85806e-13	23.1915	up
PCLAF	1.65072	8.3638	9.00201	8.98445e-15	6.10277e-13	23.148	up
FOLH1B	-2.16642	7.31301	-8.99713	9.21489e-15	6.19838e-13	23.1231	down
DUXAP10	1.52886	7.67091	8.99415	9.35857e-15	6.27242e-13	23.1079	up
TRIP13	1.205	6.37452	8.9931	9.40972e-15	6.28582e-13	23.1026	up
APOF	-2.72868	8.6284	-8.98531	9.79776e-15	6.50197e-13	23.0629	down
C1orf112	1.23377	5.93647	8.97732	1.02123e-14	6.73276e-13	23.0222	up
JCAD	1.25765	5.48112	8.97586	1.029e-14	6.76191e-13	23.0147	up
ROBO1	1.99263	8.95886	8.94991	1.1773e-14	7.66154e-13	22.8825	up
CENPK	1.62544	5.42085	8.94371	1.2158e-14	7.88666e-13	22.8509	up
GPR158	1.63071	5.92886	8.92949	1.30886e-14	8.40924e-13	22.7785	up
PROZ	-1.58361	8.00531	-8.89927	1.53084e-14	9.65097e-13	22.6246	down
ACSM3	-2.07619	7.79114	-8.89712	1.54799e-14	9.69848e-13	22.6137	down
MCM3	1.00458	8.28698	8.87724	1.71596e-14	1.06516e-12	22.5125	up
KBTBD11	-1.8178	6.31323	-8.85665	1.90909e-14	1.17064e-12	22.4078	down
ENAH	1.16654	9.21708	8.84243	2.05501e-14	1.24873e-12	22.3354	up
RCL1	-1.52621	9.47786	-8.83617	2.12274e-14	1.28601e-12	22.3036	down
TBC1D31	1.07856	6.13463	8.8167	2.34788e-14	1.40552e-12	22.2046	up
MFSD2A	-2.35967	8.66891	-8.80208	2.53249e-14	1.50266e-12	22.1303	down
CENPL	1.21947	5.7551	8.77536	2.90803e-14	1.69557e-12	21.9945	up
LPAL2	-1.12919	5.98441	-8.76703	3.03603e-14	1.76003e-12	21.9522	down
FOS	-2.21084	9.57017	-8.76499	3.06834e-14	1.76859e-12	21.9418	down
HOTS	-1.20708	6.43755	-8.74802	3.34977e-14	1.89094e-12	21.8556	down
CNIH4	1.03504	10.3429	8.74768	3.35559e-14	1.89094e-12	21.8539	up
TM6SF2	-1.0766	7.6478	-8.73461	3.59021e-14	2.01752e-12	21.7876	down
TBX15	-1.66707	6.82839	-8.72753	3.72409e-14	2.07755e-12	21.7516	down
TKFC	-1.15558	8.34097	-8.72733	3.72793e-14	2.07755e-12	21.7506	down
RNF165	-1.08936	5.71995	-8.69844	4.32834e-14	2.39233e-12	21.604	down
ID1	-1.89724	9.43009	-8.69363	4.43718e-14	2.43912e-12	21.5796	down
TUBE1	-1.49392	8.52503	-8.68796	4.56922e-14	2.49809e-12	21.5508	down
RAP2A	1.0433	8.59406	8.68461	4.64893e-14	2.52796e-12	21.5338	up
SARDH	-1.0675	7.89034	-8.67205	4.96036e-14	2.68285e-12	21.4702	down
TCF19	1.10446	6.12472	8.66216	5.22052e-14	2.81601e-12	21.42	up
NPC1L1	-1.79999	7.92364	-8.63193	6.10197e-14	3.24805e-12	21.2668	down
SLC39A5	-1.38832	9.55312	-8.63002	6.16267e-14	3.26848e-12	21.2571	down
FCGR2B	-1.97881	6.63359	-8.61808	6.55402e-14	3.42541e-12	21.1967	down
TTK	1.69326	5.72222	8.59723	7.29854e-14	3.7754e-12	21.091	up
ADRA1A	-1.01303	6.2612	-8.58948	7.59623e-14	3.90935e-12	21.0518	down
RGS5	1.45269	9.58731	8.58843	7.63744e-14	3.92055e-12	21.0465	up
ITGA9	-1.72644	7.7265	-8.58784	7.6606e-14	3.92246e-12	21.0435	down
INMT	-1.48297	7.55796	-8.56636	8.55794e-14	4.3162e-12	20.9348	down
HOGA1	-1.79943	8.28661	-8.565	8.61773e-14	4.33551e-12	20.9279	down
HELLS	1.71315	6.3666	8.55479	9.08347e-14	4.53589e-12	20.8763	up
STXBP6	1.38089	6.93604	8.54493	9.55715e-14	4.73725e-12	20.8264	up
SUCLG2	-1.02945	11.0473	-8.5298	1.03316e-13	5.05897e-12	20.7499	down
NAPSB	-1.20372	7.58035	-8.51212	1.13165e-13	5.50119e-12	20.6605	down
NUF2	1.94297	5.22173	8.50408	1.1795e-13	5.69264e-12	20.6199	up
CCNA2	1.20311	6.32992	8.49036	1.26581e-13	6.06567e-12	20.5505	up
ADIRF	-1.83311	8.54628	-8.4613	1.46998e-13	6.92882e-12	20.4038	down
DPT	-1.71062	7.47922	-8.45864	1.49019e-13	7.00773e-12	20.3904	down
PBLD	-1.7865	11.3451	-8.4422	1.62174e-13	7.55589e-12	20.3073	down
PLCB1	1.72369	7.86445	8.43443	1.68781e-13	7.82755e-12	20.2681	up
ACSL4	2.84016	7.79054	8.42	1.81774e-13	8.35334e-12	20.1954	up
GCH1	-1.57443	10.2425	-8.40103	2.00389e-13	9.0846e-12	20.0997	down
IGF1	-2.37537	9.06916	-8.39547	2.06193e-13	9.3059e-12	20.0717	down
C7	-2.91485	8.79048	-8.38581	2.16677e-13	9.64954e-12	20.023	down
EBF1	1.35346	6.47617	8.36637	2.39429e-13	1.05638e-11	19.925	up
E2F8	1.58404	5.27161	8.36178	2.45133e-13	1.07741e-11	19.9019	up
TTPAL	-1.20665	8.64079	-8.3517	2.58157e-13	1.12728e-11	19.8511	down
ANK3	-1.52921	7.57991	-8.34899	2.61764e-13	1.14057e-11	19.8375	down
PRIM1	1.10697	7.21831	8.33849	2.76249e-13	1.19157e-11	19.7846	up
JCHAIN	-3.03069	7.46686	-8.33348	2.83442e-13	1.21706e-11	19.7594	down
CDC20	1.6173	6.79648	8.3183	3.06402e-13	1.29373e-11	19.683	up
AKR7A3	-1.43901	9.81952	-8.31821	3.06534e-13	1.29373e-11	19.6826	down
KLKB1	-1.71018	10.1614	-8.30029	3.36032e-13	1.40688e-11	19.5924	down
SULT1E1	-2.16522	6.75929	-8.28183	3.6938e-13	1.52702e-11	19.4996	down
PNP	-1.02881	8.60353	-8.25689	4.19705e-13	1.70365e-11	19.3742	down
NAAA	-1.09913	8.07622	-8.24969	4.35468e-13	1.75703e-11	19.3381	down
MAN1C1	-1.52753	7.65922	-8.24731	4.40805e-13	1.77501e-11	19.3261	down
MND1	1.27697	4.85637	8.23652	4.65837e-13	1.86835e-11	19.2719	up
MCM6	1.07564	8.65376	8.21706	5.14616e-13	2.03167e-11	19.1742	up
CRNDE	2.66992	6.11556	8.19143	5.8671e-13	2.27621e-11	19.0456	up
UBE2S	1.25905	8.23448	8.18618	6.02672e-13	2.33365e-11	19.0193	up
FANCD2	1.27208	6.06543	8.15971	6.89959e-13	2.62132e-11	18.8866	up
ST6GAL2	-1.46185	4.54616	-8.15561	7.04543e-13	2.6717e-11	18.8661	down
CYP39A1	-2.69831	8.23438	-8.13792	7.71159e-13	2.89889e-11	18.7775	down
CYP2C19	-1.76804	7.33427	-8.12557	8.21345e-13	3.06848e-11	18.7156	down
CPED1	-1.4441	8.39176	-8.1226	8.33883e-13	3.10383e-11	18.7008	down
IRF8	-1.04641	8.68557	-8.11467	8.68334e-13	3.21427e-11	18.6611	down
GCDH	-1.11975	9.36237	-8.11163	8.81914e-13	3.25856e-11	18.6458	down
ZFP36	-1.03434	10.7715	-8.10504	9.12057e-13	3.34542e-11	18.6129	down
CDCA3	1.20286	7.30519	8.09946	9.38379e-13	3.4295e-11	18.585	up
THY1	1.20253	7.90622	8.08568	1.00669e-12	3.65268e-11	18.516	up
EDNRB	-1.09906	8.16186	-8.07797	1.04707e-12	3.77883e-11	18.4775	down
TIGD1	1.12926	6.04097	8.07301	1.07386e-12	3.86167e-11	18.4527	up
ADAMTSL2	-1.11698	6.2773	-8.07038	1.08837e-12	3.90688e-11	18.4395	down
SLC35D1	-1.00156	10.3518	-8.06659	1.10959e-12	3.97599e-11	18.4206	down
MRC1	-1.80828	8.84874	-8.05203	1.19502e-12	4.25192e-11	18.3479	down
SULF2	-1.63646	8.61937	-8.05039	1.20506e-12	4.27876e-11	18.3397	down
FXYD1	-1.77366	8.85407	-8.04767	1.22187e-12	4.30943e-11	18.3261	down
HAO2	-2.63137	9.61493	-8.02776	1.35225e-12	4.74438e-11	18.2266	down
DLGAP5	1.55886	5.28689	8.00229	1.53937e-12	5.31767e-11	18.0995	up
PLSCR4	-1.11181	8.5888	-7.99406	1.60521e-12	5.49805e-11	18.0585	down
SMIM24	-1.972	7.39766	-7.99236	1.61917e-12	5.52269e-11	18.05	down
TP53I3	1.26472	8.34149	7.98711	1.66293e-12	5.6478e-11	18.0238	up
CXCL2	-2.06003	10.7628	-7.98402	1.68929e-12	5.69896e-11	18.0084	down
CENPH	1.006	6.05684	7.9689	1.82428e-12	6.11346e-11	17.933	up
FAM151A	-1.40935	6.11014	-7.95103	1.99765e-12	6.63931e-11	17.844	down
CD200	1.0911	6.28372	7.94672	2.04187e-12	6.76399e-11	17.8225	up
EPB41L4A	-1.59476	7.16349	-7.94056	2.10677e-12	6.95603e-11	17.7919	down
ST3GAL6	-1.25731	8.35562	-7.94002	2.11252e-12	6.95603e-11	17.7892	down
IER2	-1.06659	10.6329	-7.93473	2.17005e-12	7.13005e-11	17.7629	down
RBMS3	-1.64569	7.39686	-7.92857	2.23899e-12	7.32081e-11	17.7322	down
AURKA	1.37749	7.27066	7.91123	2.44491e-12	7.87919e-11	17.6459	up
LHX2	-1.55119	5.96285	-7.91082	2.45005e-12	7.88315e-11	17.6439	down
CIDEB	-1.30609	9.91554	-7.90732	2.49393e-12	8.00539e-11	17.6265	down
CYP2B6	-2.46656	9.23993	-7.90061	2.58027e-12	8.23645e-11	17.5931	down
RBM24	2.13561	6.4231	7.89982	2.5906e-12	8.25637e-11	17.5892	up
TOMM40L	1.09016	7.86674	7.89946	2.59534e-12	8.25842e-11	17.5874	up
ZFP1	-1.2019	7.48546	-7.88733	2.76007e-12	8.71389e-11	17.5271	down
STEAP4	-1.80851	7.83441	-7.87959	2.8705e-12	9.03423e-11	17.4886	down
CDC7	1.21637	6.0716	7.86303	3.12185e-12	9.68927e-11	17.4063	up
MTFR2	1.21239	5.31498	7.8591	3.18448e-12	9.85332e-11	17.3869	up
ACACB	-1.42375	9.90281	-7.84907	3.35049e-12	1.03038e-10	17.337	down
MAMDC4	-1.11613	7.40951	-7.8159	3.96294e-12	1.20223e-10	17.1725	down
SOCS2	-1.65034	9.27294	-7.81434	3.99448e-12	1.20998e-10	17.1647	down
OTUD6B	1.07665	7.0433	7.79778	4.34346e-12	1.30379e-10	17.0826	up
CDC25C	1.04783	5.68694	7.78924	4.5351e-12	1.35142e-10	17.0403	up
ETFDH	-1.27081	8.9503	-7.78674	4.59277e-12	1.36416e-10	17.0279	down
LINC00598	-1.07367	6.02692	-7.78011	4.74917e-12	1.40278e-10	16.9951	down
RETREG1	-2.39292	8.09513	-7.76738	5.06475e-12	1.48861e-10	16.932	down
LDHD	-1.21267	7.82936	-7.75323	5.43982e-12	1.57903e-10	16.862	down
AGL	-1.00381	9.86645	-7.72597	6.24207e-12	1.78874e-10	16.7272	down
GMNN	1.26565	9.25587	7.71904	6.46432e-12	1.84719e-10	16.6929	up
CCNE2	1.43876	6.30321	7.70776	6.84244e-12	1.93062e-10	16.6372	up
FOXM1	1.15105	6.36886	7.69458	7.31242e-12	2.04322e-10	16.5721	up
MS4A6A	-1.30086	9.0734	-7.6876	7.57441e-12	2.09798e-10	16.5377	down
HSPB1	1.07035	11.0541	7.68754	7.57668e-12	2.09798e-10	16.5374	up
MT1G	-1.90895	12.3577	-7.67555	8.04826e-12	2.21811e-10	16.4782	down
LDLR	-1.18933	9.93977	-7.67045	8.25776e-12	2.26656e-10	16.453	down
C1RL	-1.05404	10.213	-7.65055	9.12769e-12	2.48505e-10	16.3549	down
GLS2	-2.4509	8.8116	-7.64903	9.19784e-12	2.50077e-10	16.3474	down
CENPE	1.09504	5.36351	7.62077	1.06023e-11	2.81065e-10	16.2082	up
KIF11	1.39386	4.99114	7.61619	1.08489e-11	2.861e-10	16.1856	up
ANXA2	1.15593	11.6036	7.61134	1.11168e-11	2.9202e-10	16.1618	up
SLC38A6	1.12838	7.53471	7.60843	1.12806e-11	2.95552e-10	16.1474	up
IL13RA2	-1.88332	5.6686	-7.58502	1.26878e-11	3.27739e-10	16.0323	down
EGR1	-1.73369	10.8203	-7.56818	1.38067e-11	3.53024e-10	15.9495	down
ACAA1	-1.01403	11.9395	-7.55845	1.44972e-11	3.68809e-10	15.9017	down
FBP1	-1.80911	10.7597	-7.55665	1.46287e-11	3.70916e-10	15.8928	down
CYFIP2	-1.52816	8.86806	-7.54512	1.54991e-11	3.90362e-10	15.8362	down
OLFML2B	1.08581	5.99071	7.54351	1.56251e-11	3.92762e-10	15.8283	up
MT1F	-1.78263	11.8827	-7.53872	1.6005e-11	4.011e-10	15.8048	down
PPID	-1.21946	8.65984	-7.53152	1.65928e-11	4.14799e-10	15.7695	down
FREM2	-2.37212	4.87172	-7.52811	1.68785e-11	4.20898e-10	15.7527	down
SLC3A1	-1.85263	6.81712	-7.51703	1.78417e-11	4.41641e-10	15.6984	down
MAGI2-AS3	-1.43788	7.11557	-7.51669	1.78725e-11	4.41863e-10	15.6967	down
TEK	-1.05256	6.72173	-7.51622	1.79144e-11	4.42356e-10	15.6944	down
PLCXD3	-1.19816	5.99645	-7.50917	1.85579e-11	4.55458e-10	15.6598	down
EML6	1.21317	6.76416	7.50435	1.90116e-11	4.6546e-10	15.6362	up
EPHX2	-1.43582	9.0379	-7.49517	1.99051e-11	4.84398e-10	15.5912	down
KCNMA1	-1.2793	8.22152	-7.48873	2.05569e-11	4.97856e-10	15.5597	down
DCN	-2.48822	10.1829	-7.48351	2.11009e-11	5.09198e-10	15.5341	down
DEPDC1B	1.45815	4.7975	7.48011	2.14629e-11	5.16698e-10	15.5174	up
PGLYRP2	-2.19238	9.6863	-7.47432	2.20925e-11	5.28701e-10	15.4891	down
CYP2A7	-2.03384	10.6984	-7.45228	2.46658e-11	5.81316e-10	15.3812	down
EGR2	-1.62175	7.40547	-7.44103	2.60907e-11	6.11328e-10	15.3262	down
GHR	-2.29795	10.2488	-7.43341	2.71035e-11	6.32122e-10	15.289	down
POLE2	1.37816	7.08856	7.41614	2.95418e-11	6.8317e-10	15.2046	up
SLC16A4	-1.73424	6.16904	-7.39646	3.25889e-11	7.45407e-10	15.1085	down
KIF18B	1.26274	6.67284	7.3739	3.64651e-11	8.28432e-10	14.9985	up
OIP5	1.08951	6.13889	7.37223	3.67705e-11	8.33606e-10	14.9903	up
LOC389834	1.01933	7.26642	7.35467	4.01298e-11	9.05568e-10	14.9048	up
PHYHD1	-1.39663	7.97393	-7.33255	4.47962e-11	9.99688e-10	14.7971	down
CCDC3	-1.00977	8.56713	-7.33099	4.51458e-11	1.00638e-09	14.7895	down
UBE2C	1.22198	8.15392	7.32746	4.59447e-11	1.02305e-09	14.7723	up
PRSS8	-1.31685	6.50571	-7.31971	4.77478e-11	1.0597e-09	14.7346	down
NR1I2	-1.84414	8.74134	-7.31659	4.84943e-11	1.07272e-09	14.7194	down
RBP7	1.11082	7.67383	7.30817	5.05655e-11	1.11366e-09	14.6785	up
GBA3	-2.48525	10.2237	-7.26623	6.22665e-11	1.33801e-09	14.4748	down
PANK1	-1.19692	9.57259	-7.26539	6.25249e-11	1.34047e-09	14.4708	down
SLC17A1	-1.21465	6.85702	-7.26316	6.32215e-11	1.35252e-09	14.4599	down
GABARAPL1	-1.12542	9.03738	-7.26189	6.36213e-11	1.3582e-09	14.4537	down
TACSTD2	-2.23492	6.4794	-7.25686	6.52254e-11	1.38969e-09	14.4294	down
ZIC2	2.07357	5.21684	7.25662	6.53033e-11	1.38969e-09	14.4282	up
PDGFRA	-2.40714	8.28716	-7.25534	6.57198e-11	1.39708e-09	14.422	down
SLC41A2	-1.28084	8.78323	-7.23665	7.20967e-11	1.52142e-09	14.3314	down
SMYD3	1.32986	7.62489	7.22962	7.465e-11	1.57201e-09	14.2973	up
CYP4V2	-1.19739	9.73558	-7.22371	7.68636e-11	1.61022e-09	14.2687	down
HMGB2	1.01284	9.71354	7.22255	7.73088e-11	1.61656e-09	14.2631	up
TENM1	-2.44318	7.227	-7.2225	7.73262e-11	1.61656e-09	14.2629	down
SERPINI1	1.23648	6.36695	7.21076	8.19533e-11	1.70095e-09	14.206	up
MT1H	-1.64141	12.1947	-7.20687	8.3544e-11	1.72863e-09	14.1872	down
GCKR	-1.12624	9.47597	-7.20629	8.37825e-11	1.73179e-09	14.1844	down
CA2	-1.28541	9.80094	-7.20361	8.49003e-11	1.74952e-09	14.1714	down
PPP1R3B	-1.58326	10.0594	-7.18911	9.1212e-11	1.87193e-09	14.1013	down
GREM2	-1.71815	6.51218	-7.18579	9.27193e-11	1.89324e-09	14.0853	down
DUSP6	-1.02188	10.8243	-7.18257	9.42057e-11	1.9197e-09	14.0697	down
NR0B2	-1.14746	9.77015	-7.1777	9.64988e-11	1.96049e-09	14.0462	down
CDC6	1.05024	5.18218	7.16037	1.0512e-10	2.11436e-09	13.9625	up
NR3C2	-1.01693	7.2374	-7.13893	1.16848e-10	2.32017e-09	13.859	down
IGKC	-1.92917	9.00836	-7.12957	1.22365e-10	2.41546e-09	13.8139	down
ATF5	-1.83769	10.5189	-7.12852	1.23004e-10	2.42569e-09	13.8088	down
SKAP1	-1.11382	7.87443	-7.11743	1.2991e-10	2.54695e-09	13.7554	down
AKR1C3	1.11089	12.1963	7.11378	1.32268e-10	2.58815e-09	13.7378	up
KIF2C	1.10131	6.57743	7.10858	1.35696e-10	2.64751e-09	13.7128	up
GPR180	-1.03627	6.54932	-7.09905	1.42219e-10	2.76143e-09	13.6668	down
CDKN2B	1.19053	5.35124	7.09385	1.45902e-10	2.82211e-09	13.6418	up
ANXA10	-1.83253	8.92268	-7.09362	1.46071e-10	2.82265e-09	13.6407	down
LAMC1	1.08694	9.63919	7.07784	1.57861e-10	3.02439e-09	13.5648	up
GLDC	-1.32881	10.617	-7.05536	1.76298e-10	3.34584e-09	13.4568	down
SQLE	1.71521	8.5785	7.05272	1.78602e-10	3.37687e-09	13.4441	up
ATF3	-1.27945	9.43408	-7.0381	1.91885e-10	3.59766e-09	13.374	down
FTCD	-1.34607	10.2951	-7.02876	2.0089e-10	3.763e-09	13.3291	down
PROM1	-1.64562	5.26411	-7.01351	2.1649e-10	4.02903e-09	13.256	down
GADD45B	-1.27325	10.4697	-7.01239	2.1768e-10	4.04744e-09	13.2506	down
NR4A3	-1.41796	6.96646	-7.00849	2.2188e-10	4.10285e-09	13.232	down
GLYAT	-2.20737	9.98452	-7.00558	2.25066e-10	4.15414e-09	13.218	down
MT1M	-2.85969	8.83085	-7.00179	2.29282e-10	4.22424e-09	13.1999	down
ST8SIA6-AS1	1.64279	6.66235	6.98655	2.47059e-10	4.51514e-09	13.1269	up
ECRG4	-1.03652	5.57287	-6.98269	2.51769e-10	4.58917e-09	13.1084	down
PLIN2	-1.13802	11.4865	-6.98265	2.5182e-10	4.58917e-09	13.1082	down
KNL1	1.00417	8.05009	6.95393	2.89804e-10	5.19228e-09	12.9709	up
FAM149A	-1.36029	8.19282	-6.94972	2.95824e-10	5.27671e-09	12.9508	down
DLG5	1.07616	8.23901	6.94225	3.06831e-10	5.45376e-09	12.9151	up
TMEM45A	-1.67436	9.54096	-6.93146	3.23434e-10	5.72365e-09	12.8636	down
SYTL5	-1.14757	6.3466	-6.92434	3.34869e-10	5.91045e-09	12.8297	down
APOBEC3B	1.64036	5.58708	6.92199	3.38735e-10	5.96825e-09	12.8184	up
C3P1	-2.09606	10.297	-6.91806	3.45285e-10	6.06258e-09	12.7997	down
CD1D	-1.42905	7.01791	-6.91499	3.505e-10	6.14869e-09	12.7851	down
IGLC1	-2.29213	10.7	-6.91393	3.52311e-10	6.16518e-09	12.78	down
AGXT2	-1.52539	9.10188	-6.89462	3.8711e-10	6.67484e-09	12.688	down
PSAT1	-1.20495	10.9081	-6.88613	4.03448e-10	6.91517e-09	12.6476	down
C1orf162	-1.03776	7.94883	-6.88403	4.076e-10	6.93918e-09	12.6376	down
CYP4A11	-1.93618	10.1118	-6.87785	4.20045e-10	7.11649e-09	12.6082	down
EDIL3	1.86562	7.46963	6.87526	4.25386e-10	7.18764e-09	12.5959	up
MNS1	1.49397	5.58346	6.87323	4.29609e-10	7.24054e-09	12.5862	up
SLC17A3	-1.44521	8.13605	-6.85447	4.70684e-10	7.8411e-09	12.497	down
MT1HL1	-1.27849	12.8529	-6.85159	4.77325e-10	7.92556e-09	12.4833	down
SLCO1B3	-2.93968	9.01452	-6.84905	4.83247e-10	8.0107e-09	12.4713	down
IL1RAP	-1.18685	9.31057	-6.83628	5.14186e-10	8.461e-09	12.4107	down
IGLL3P	-1.36025	8.4343	-6.82953	5.31328e-10	8.68216e-09	12.3786	down
EPB41L4B	-1.10863	10.325	-6.82497	5.43226e-10	8.8166e-09	12.357	down
SERPINE1	-1.59966	9.17881	-6.81865	5.60172e-10	9.06248e-09	12.327	down
SPC25	1.27698	4.84764	6.81639	5.66343e-10	9.12599e-09	12.3163	up
CEP55	1.24787	4.95593	6.81638	5.6636e-10	9.12599e-09	12.3163	up
OSBPL3	1.02904	6.40555	6.81413	5.72603e-10	9.21923e-09	12.3055	up
SPINK1	3.67995	9.41121	6.79759	6.20428e-10	9.87886e-09	12.2272	up
TRPM8	-1.9318	8.72585	-6.796	6.25239e-10	9.93978e-09	12.2197	down
FBLN5	-1.2572	7.26034	-6.78694	6.53302e-10	1.03451e-08	12.1768	down
SULT1A2	-1.02518	10.1269	-6.7797	6.76647e-10	1.06563e-08	12.1425	down
RNF125	-1.2667	8.10788	-6.77517	6.91653e-10	1.08418e-08	12.1211	down
PIK3C2G	-1.25544	6.8381	-6.76982	7.09799e-10	1.11004e-08	12.0958	down
MT1E	-1.55819	12.4882	-6.75845	7.49974e-10	1.16834e-08	12.042	down
CNTN4	-1.12459	5.56135	-6.7454	7.98836e-10	1.23083e-08	11.9804	down
ANGPTL1	-1.3815	6.10623	-6.73762	8.29432e-10	1.26765e-08	11.9437	down
AQP3	-1.12388	9.87493	-6.73506	8.39773e-10	1.27958e-08	11.9316	down
CHML	1.26119	7.67281	6.72202	8.94397e-10	1.35057e-08	11.87	up
SERPINB9	-1.02038	8.32751	-6.72132	8.97429e-10	1.35413e-08	11.8667	down
SLC7A2	-1.4544	10.7646	-6.71639	9.19029e-10	1.38259e-08	11.8435	down
CA5A	-1.0776	8.27086	-6.69688	1.00979e-09	1.51123e-08	11.7516	down
CTHRC1	2.38653	6.59045	6.69229	1.03234e-09	1.53814e-08	11.73	up
DHRS1	-1.09462	10.4316	-6.67771	1.10751e-09	1.63684e-08	11.6614	down
EXOC3L4	-1.1497	8.04495	-6.6729	1.13351e-09	1.66866e-08	11.6388	down
COMT	-1.07224	10.1359	-6.6718	1.13949e-09	1.67414e-08	11.6336	down
CDKN1C	-1.00295	7.2648	-6.66694	1.16648e-09	1.70649e-08	11.6108	down
FGL2	-1.07216	8.81355	-6.65779	1.219e-09	1.77176e-08	11.5678	down
THRSP	-2.99185	9.40267	-6.64897	1.27188e-09	1.83671e-08	11.5263	down
PPBP	-1.04224	4.24304	-6.63472	1.36205e-09	1.95712e-08	11.4595	down
FAS	-1.09494	7.57481	-6.63118	1.3854e-09	1.98502e-08	11.4429	down
GAS2L3	1.23427	7.46492	6.62944	1.39707e-09	1.99952e-08	11.4347	up
OGDHL	-1.62699	9.25076	-6.62937	1.3975e-09	1.99952e-08	11.4344	down
RDH16	-1.95359	10.4947	-6.62404	1.43374e-09	2.04123e-08	11.4094	down
COL4A2	1.09984	10.2156	6.62151	1.45131e-09	2.06006e-08	11.3975	up
SLC22A1	-2.54777	10.2418	-6.60808	1.54792e-09	2.18223e-08	11.3347	down
CCN1	-1.52519	10.2163	-6.60474	1.57295e-09	2.21289e-08	11.319	down
OAT	-1.70303	9.95296	-6.60274	1.58814e-09	2.2327e-08	11.3096	down
MT1X	-1.46542	12.7989	-6.59256	1.66758e-09	2.33462e-08	11.262	down
AGBL3	1.07519	4.60994	6.58876	1.69828e-09	2.371e-08	11.2442	up
KCND3	-1.72074	7.67289	-6.58778	1.70624e-09	2.38047e-08	11.2396	down
TFPI2	-1.57287	5.98504	-6.58614	1.71967e-09	2.39094e-08	11.232	down
SERPINA4	-1.49786	10.4705	-6.58462	1.73231e-09	2.40685e-08	11.2248	down
NNMT	-1.91193	12.2416	-6.57525	1.81182e-09	2.50525e-08	11.1811	down
SIPA1L2	1.24104	8.06133	6.57345	1.82753e-09	2.52179e-08	11.1726	up
TREH	-1.07378	5.83289	-6.5671	1.88392e-09	2.59251e-08	11.143	down
SHCBP1	1.09958	5.15377	6.56013	1.94785e-09	2.6614e-08	11.1104	up
KCNJ16	-1.3923	4.24802	-6.55038	2.04087e-09	2.75955e-08	11.0649	down
LRRC1	1.29085	6.50186	6.54762	2.06795e-09	2.79302e-08	11.0521	up
CLYBL	-1.09235	8.74772	-6.52926	2.25756e-09	3.02216e-08	10.9665	down
N4BP2L1	-1.04581	9.99716	-6.51774	2.38522e-09	3.16783e-08	10.9128	down
IGF2BP3	2.2091	5.99475	6.51284	2.44173e-09	3.23224e-08	10.89	up
CYP2A6	-2.33829	11.3222	-6.49732	2.62931e-09	3.44216e-08	10.8178	down
MCC	-1.46221	8.48178	-6.47396	2.93886e-09	3.7884e-08	10.7093	down
ZFPM2	-1.16783	5.5223	-6.46245	3.10426e-09	3.98348e-08	10.6559	down
MT2A	-1.17717	13.2067	-6.46234	3.10598e-09	3.98348e-08	10.6553	down
ATAD2	1.07679	7.74234	6.45533	3.21126e-09	4.10025e-08	10.6228	up
MYO10	-1.22819	7.66886	-6.4544	3.22547e-09	4.11579e-08	10.6185	down
GADD45A	-1.01925	10.8957	-6.44942	3.3027e-09	4.20371e-08	10.5955	down
AKR1D1	-2.5679	10.2988	-6.44638	3.35076e-09	4.25682e-08	10.5814	down
CYP2C18	-1.61145	9.73381	-6.44085	3.44002e-09	4.36197e-08	10.5558	down
DEPDC1	1.08902	5.50857	6.43619	3.51712e-09	4.44855e-08	10.5341	up
C1R	-1.18191	12.0242	-6.43514	3.53456e-09	4.4678e-08	10.5293	down
DEPDC7	-1.3883	9.17989	-6.41049	3.9733e-09	4.96946e-08	10.4153	down
PRODH2	-1.05199	9.84982	-6.40467	4.08444e-09	5.09582e-08	10.3884	down
FABP5	1.31867	8.43544	6.39575	4.2607e-09	5.28267e-08	10.3472	up
TXNRD1	1.06399	10.0823	6.39564	4.263e-09	5.28267e-08	10.3467	up
TPX2	1.06366	6.92237	6.37618	4.67451e-09	5.71827e-08	10.2568	up
AKR1B10	3.04123	9.85883	6.37607	4.67689e-09	5.71827e-08	10.2564	up
CNTN3	-2.46521	6.28858	-6.37503	4.69991e-09	5.74099e-08	10.2516	down
GSPT2	-1.5525	7.20706	-6.37435	4.71508e-09	5.7545e-08	10.2484	down
PTGS2	-1.5944	5.05673	-6.36457	4.93843e-09	5.98366e-08	10.2033	down
SOX6	-1.18008	7.42683	-6.36234	4.99069e-09	6.03249e-08	10.1931	down
TKT	1.01299	9.84749	6.35369	5.19898e-09	6.25428e-08	10.1532	up
MCM4	1.05513	7.54989	6.33403	5.70465e-09	6.82595e-08	10.0628	up
WDR72	-2.04564	8.96009	-6.32511	5.94979e-09	7.09404e-08	10.0218	down
SERPINF2	-1.05788	10.7118	-6.32168	6.04682e-09	7.19696e-08	10.006	down
PTGIS	-1.41017	7.52151	-6.32058	6.07834e-09	7.22909e-08	10.001	down
CLDN10	-1.64799	6.09708	-6.30477	6.54845e-09	7.71211e-08	9.92838	down
LIPC	-1.21138	9.95007	-6.29869	6.73851e-09	7.91285e-08	9.90051	down
ACADL	-1.57386	7.47091	-6.29788	6.76445e-09	7.93407e-08	9.89677	down
PHLDA1	-1.38777	9.67854	-6.29332	6.9111e-09	8.08727e-08	9.87588	down
PYROXD2	-1.15302	7.42209	-6.29116	6.98166e-09	8.15565e-08	9.86598	down
F11	-1.17499	9.54074	-6.28022	7.35026e-09	8.54664e-08	9.81587	down
CD109	1.46612	6.79213	6.27589	7.50177e-09	8.70274e-08	9.79599	up
PRG4	-1.8168	6.93319	-6.27354	7.58507e-09	8.78927e-08	9.78524	down
HBB	-1.38047	10.6996	-6.25814	8.15394e-09	9.36556e-08	9.7148	down
C8A	-1.52372	10.7293	-6.25143	8.41489e-09	9.65654e-08	9.68413	down
CYP3A43	-1.24783	8.78082	-6.25084	8.43835e-09	9.66696e-08	9.68142	down
IYD	-1.32644	6.42559	-6.24852	8.53062e-09	9.75803e-08	9.67082	down
BCHE	-2.28617	9.71325	-6.24551	8.65184e-09	9.87789e-08	9.65708	down
GBP1	-1.07971	10.1785	-6.24461	8.68855e-09	9.9106e-08	9.65296	down
CYP2J2	-1.01414	9.50781	-6.2443	8.70107e-09	9.91725e-08	9.65156	down
CYP2C9	-1.77563	12.1909	-6.22165	9.6759e-09	1.08566e-07	9.54815	down
CCL2	-1.59208	8.59853	-6.20859	1.02858e-08	1.14969e-07	9.48864	down
CALHM6	-1.36721	8.06913	-6.20858	1.02864e-08	1.14969e-07	9.48858	down
NAMPT	-1.30087	10.5764	-6.19832	1.07921e-08	1.19692e-07	9.44187	down
APOA5	-1.63347	10.1701	-6.19793	1.08116e-08	1.19711e-07	9.4401	down
RBP5	-1.24098	9.2248	-6.19378	1.10236e-08	1.21658e-07	9.4212	down
FOXP2	-1.19814	6.85394	-6.19071	1.1183e-08	1.22946e-07	9.40722	down
GYS2	-2.33833	9.06508	-6.18133	1.16839e-08	1.27965e-07	9.36457	down
TRIM16	1.39613	6.73023	6.17213	1.21969e-08	1.32719e-07	9.32274	up
GRAMD1C	-1.50627	7.93037	-6.16715	1.24835e-08	1.35545e-07	9.30014	down
MIR99AHG	-1.10085	6.33741	-6.16341	1.27032e-08	1.37486e-07	9.28316	down
BAG2	1.08402	7.3874	6.1576	1.30521e-08	1.4096e-07	9.25678	up
LINC01554	-1.71745	7.33498	-6.1458	1.37899e-08	1.47898e-07	9.20327	down
LOC101928505	-1.19736	7.10893	-6.13383	1.45804e-08	1.5514e-07	9.14902	down
LEF1	1.37959	7.08939	6.12238	1.53788e-08	1.62947e-07	9.09715	up
VNN1	-2.26002	10.2993	-6.08178	1.857e-08	1.93113e-07	8.9137	down
ABI3BP	-1.72321	6.53469	-6.05341	2.11782e-08	2.17873e-07	8.78586	down
AFM	-1.86582	10.2762	-6.03688	2.28616e-08	2.32817e-07	8.71147	down
BASP1	-1.21068	8.04212	-6.03416	2.31505e-08	2.35165e-07	8.69926	down
DAO	-1.18081	8.82203	-6.03055	2.35401e-08	2.38539e-07	8.68304	down
FYB2	-1.34968	8.50535	-6.03053	2.35418e-08	2.38539e-07	8.68297	down
HABP2	-1.27668	10.6596	-6.02759	2.38648e-08	2.41448e-07	8.66971	down
GPT2	-1.18868	8.35079	-6.01664	2.51014e-08	2.52441e-07	8.62059	down
SLC46A3	-1.44267	9.51832	-6.01599	2.51777e-08	2.52956e-07	8.61764	down
COLEC11	-1.42971	9.83367	-6.00463	2.65324e-08	2.65377e-07	8.56668	down
TSPAN12	-1.11056	8.2628	-5.99218	2.80994e-08	2.79664e-07	8.51089	down
PRKAA2	1.4068	7.16576	5.98117	2.95607e-08	2.9305e-07	8.46161	up
CCDC198	-1.23869	8.391	-5.96374	3.20287e-08	3.14733e-07	8.38367	down
CYP3A4	-1.86978	12.0913	-5.96314	3.21175e-08	3.15452e-07	8.38098	down
NMRAL2P	1.7309	5.57133	5.95339	3.35892e-08	3.28786e-07	8.33743	up
ACSL1	-1.07715	11.7947	-5.93854	3.59595e-08	3.4995e-07	8.27116	down
ID4	-1.5725	7.28846	-5.93308	3.68712e-08	3.57615e-07	8.24683	down
CFTR	-1.52625	6.11165	-5.92201	3.87906e-08	3.72801e-07	8.19752	down
LINC01146	-1.11526	6.13879	-5.92161	3.88618e-08	3.73154e-07	8.19574	down
CPN2	-1.29167	8.73779	-5.92042	3.90749e-08	3.74665e-07	8.19042	down
SLC22A4	1.06824	5.21404	5.9088	4.12095e-08	3.92522e-07	8.13874	up
SDS	-1.82348	10.3299	-5.90129	4.26516e-08	4.0492e-07	8.10532	down
GABRP	-1.13013	4.7969	-5.89741	4.34141e-08	4.1119e-07	8.08811	down
SFN	1.03097	8.88528	5.88777	4.53716e-08	4.26726e-07	8.04527	up
SLC25A18	-1.42285	9.62402	-5.87363	4.83987e-08	4.52244e-07	7.98253	down
CDA	-1.20429	7.39534	-5.87167	4.8833e-08	4.55458e-07	7.97385	down
SULT1C2	2.12355	6.75024	5.86708	4.98679e-08	4.63611e-07	7.95348	up
PDE11A	-1.46464	6.65975	-5.84984	5.39462e-08	4.96039e-07	7.87713	down
SSX1	1.92535	6.36336	5.84346	5.55378e-08	5.09281e-07	7.8489	up
CCL4	-1.04611	8.24563	-5.84333	5.55697e-08	5.09342e-07	7.84834	down
DUSP5	-1.04985	8.3095	-5.83475	5.77845e-08	5.28923e-07	7.81039	down
IL33	-1.07582	6.11727	-5.82348	6.08219e-08	5.52215e-07	7.76064	down
PRKAR2B	-1.1421	5.60326	-5.81795	6.2371e-08	5.64754e-07	7.73622	down
TDO2	-1.53152	11.8256	-5.80792	6.52787e-08	5.8765e-07	7.69199	down
CCL5	-1.26317	8.07653	-5.79774	6.83665e-08	6.11737e-07	7.64712	down
MBL2	-1.97892	9.76261	-5.782	7.34267e-08	6.53135e-07	7.57781	down
CRISPLD2	-1.37968	7.87757	-5.7766	7.52454e-08	6.67253e-07	7.55406	down
SEMA6D	-1.00936	6.12249	-5.77643	7.53023e-08	6.67464e-07	7.55332	down
VSIG4	-1.00547	7.81156	-5.76824	7.81461e-08	6.9085e-07	7.51735	down
KYNU	-1.20694	9.50368	-5.75365	8.34815e-08	7.33198e-07	7.45325	down
SAMD5	-1.42675	7.18831	-5.73646	9.02229e-08	7.8455e-07	7.3779	down
SLC17A2	-1.48078	9.18823	-5.73445	9.10429e-08	7.90999e-07	7.36912	down
ADAMTSL3	-1.09911	7.14426	-5.72638	9.44196e-08	8.16819e-07	7.33378	down
BGN	-1.43454	9.07319	-5.72211	9.62588e-08	8.29528e-07	7.31507	down
THBS1	-1.57667	9.93253	-5.71866	9.77681e-08	8.41098e-07	7.29997	down
TMEM154	-1.17046	6.19471	-5.69828	1.07168e-07	9.11082e-07	7.21093	down
C9	-2.78745	10.813	-5.68814	1.12169e-07	9.46815e-07	7.16669	down
ALDH8A1	-1.54626	11.2687	-5.68395	1.143e-07	9.63599e-07	7.14843	down
ADAM9	1.01892	8.40973	5.66968	1.2187e-07	1.02055e-06	7.08624	up
SPIDR	-1.11004	8.13975	-5.6693	1.22075e-07	1.02103e-06	7.08462	down
CCL21	-1.00394	7.42703	-5.66733	1.23157e-07	1.02924e-06	7.07605	down
FXYD2	-1.35608	7.73391	-5.656	1.29582e-07	1.07624e-06	7.02675	down
PLAG1	1.00145	4.89708	5.63719	1.40977e-07	1.16085e-06	6.94503	up
MAP2	1.61359	8.09516	5.63579	1.41866e-07	1.16484e-06	6.93893	up
ARRDC4	-1.15648	8.66888	-5.62763	1.47141e-07	1.20325e-06	6.90354	down
HRCT1	1.05051	7.56993	5.627	1.47556e-07	1.20615e-06	6.90081	up
NR4A2	-1.37819	7.94239	-5.60622	1.6191e-07	1.31232e-06	6.81083	down
ADAMTS1	-1.00593	8.60945	-5.59967	1.66714e-07	1.34801e-06	6.78249	down
PLGLB2	-1.05571	6.47405	-5.58706	1.76363e-07	1.41694e-06	6.72797	down
CYP2B7P	-1.81907	8.29625	-5.57314	1.87645e-07	1.49823e-06	6.66789	down
GJB2	-1.10304	8.2966	-5.56239	1.96838e-07	1.56462e-06	6.62154	down
FAM110C	-1.47965	8.61122	-5.54959	2.08362e-07	1.64908e-06	6.56642	down
SLC25A15	-1.02414	10.3228	-5.54705	2.10728e-07	1.66519e-06	6.55549	down
SOCS3	-1.44807	8.1017	-5.54603	2.11684e-07	1.67143e-06	6.5511	down
ADH6	-1.31474	11.1785	-5.54389	2.13702e-07	1.68605e-06	6.54191	down
CTH	-1.66343	10.7417	-5.5355	2.21806e-07	1.74317e-06	6.50586	down
HYAL1	-1.1189	9.7388	-5.51242	2.45706e-07	1.90575e-06	6.40675	down
CYP4F2	-1.25514	10.1527	-5.51105	2.47193e-07	1.91655e-06	6.40091	down
KLF4	-1.30347	8.46012	-5.50562	2.5321e-07	1.95793e-06	6.37762	down
DAB1	-1.01583	6.45619	-5.50439	2.54588e-07	1.96709e-06	6.37236	down
MXRA5	-1.25838	7.75737	-5.49993	2.59667e-07	2.00096e-06	6.35324	down
DNAJC12	-1.54564	8.75861	-5.49153	2.6949e-07	2.06639e-06	6.31729	down
SPP2	-1.71299	10.3436	-5.48378	2.78876e-07	2.13269e-06	6.28414	down
SORL1	-1.1031	10.5752	-5.46323	3.05344e-07	2.31841e-06	6.19637	down
XDH	-1.53807	10.193	-5.44997	3.23698e-07	2.44123e-06	6.13987	down
THBS4	1.12599	6.82809	5.44552	3.30109e-07	2.48401e-06	6.12089	up
CD163	-1.05062	8.9701	-5.42909	3.54838e-07	2.64933e-06	6.05099	down
CCL19	-1.45165	7.47642	-5.42625	3.59296e-07	2.67785e-06	6.03891	down
DTNA	1.18887	7.2322	5.42231	3.65562e-07	2.71633e-06	6.02218	up
TAT	-1.31588	9.37265	-5.42219	3.65751e-07	2.71673e-06	6.02168	down
ART4	-1.34295	8.18678	-5.4043	3.95609e-07	2.90536e-06	5.94576	down
PCK2	-1.04457	10.8742	-5.38249	4.35251e-07	3.16082e-06	5.85339	down
AVPR1A	-1.97115	7.92887	-5.37573	4.48313e-07	3.24516e-06	5.82479	down
C11orf96	-1.30076	9.79363	-5.37261	4.54465e-07	3.28733e-06	5.81161	down
C6	-1.58954	11.2062	-5.36484	4.70167e-07	3.38272e-06	5.77876	down
LINC00844	-2.39202	9.00367	-5.34986	5.01918e-07	3.5894e-06	5.71558	down
ACADSB	-1.07954	10.185	-5.34449	5.13795e-07	3.66265e-06	5.69296	down
ABCA8	-1.66154	9.10287	-5.33804	5.28459e-07	3.76054e-06	5.66576	down
SRD5A1	-1.02175	9.50789	-5.33147	5.4379e-07	3.86011e-06	5.63811	down
CD69	-1.27292	6.18582	-5.29434	6.3898e-07	4.47286e-06	5.48221	down
SLC6A12	-1.07006	8.17276	-5.2915	6.4688e-07	4.52189e-06	5.47034	down
LECT2	-1.77889	11.3035	-5.28195	6.74223e-07	4.70161e-06	5.43034	down
CFHR3	-1.83619	10.4582	-5.27867	6.8387e-07	4.76395e-06	5.41661	down
UGT2B28	-1.0888	12.1906	-5.2699	7.10339e-07	4.93275e-06	5.37992	down
ISX	1.18962	5.58487	5.26626	7.21609e-07	4.99237e-06	5.36472	up
TSLP	-1.35362	6.17961	-5.25869	7.45614e-07	5.14604e-06	5.33311	down
ACOT12	-1.71016	8.76391	-5.25814	7.47371e-07	5.15293e-06	5.33083	down
ANG	-1.11688	12.1759	-5.25207	7.67227e-07	5.27361e-06	5.30551	down
POU2AF1	-1.27886	6.27159	-5.2403	8.07208e-07	5.52582e-06	5.25645	down
GIPC2	-1.19297	7.49164	-5.22911	8.47084e-07	5.77334e-06	5.20988	down
SPP1	2.07042	10.1774	5.21949	8.82929e-07	5.97525e-06	5.16986	up
PLXNC1	1.2055	7.20527	5.21066	9.17102e-07	6.19198e-06	5.1332	up
ANO1	-1.53516	7.97677	-5.1903	1.00095e-06	6.67765e-06	5.04875	down
CCL20	1.95495	8.47953	5.17045	1.08983e-06	7.18972e-06	4.96665	up
ALKAL2	-1.27592	5.13484	-5.15428	1.16789e-06	7.65219e-06	4.8999	down
ANKRD29	1.18832	7.04264	5.14352	1.22286e-06	7.97092e-06	4.85553	up
FGF13	1.368	6.62638	5.11365	1.38895e-06	8.9266e-06	4.73269	up
STK39	1.20729	6.63763	5.10805	1.42242e-06	9.09248e-06	4.70973	up
EVA1A	-1.00522	9.73154	-5.09952	1.47499e-06	9.3869e-06	4.67473	down
LINC01419	2.06828	4.5912	5.07895	1.60959e-06	1.0157e-05	4.59054	up
ZSCAN31	1.03878	6.68361	5.07471	1.6388e-06	1.0305e-05	4.57321	up
PLA1A	-1.08156	8.95994	-5.07204	1.6574e-06	1.03937e-05	4.56233	down
PTPRD	-1.06832	7.03749	-5.04697	1.84297e-06	1.14612e-05	4.46005	down
ADH4	-2.13327	11.9262	-5.04252	1.8779e-06	1.16476e-05	4.44196	down
SLC27A5	-1.29843	11.0967	-5.04163	1.885e-06	1.16794e-05	4.43832	down
LAMA3	1.17935	7.19526	5.03722	1.92045e-06	1.18735e-05	4.42037	up
LCN2	1.84104	8.34452	5.03189	1.96414e-06	1.20939e-05	4.3987	up
GAS1	-1.30512	6.44981	-5.01425	2.11576e-06	1.29025e-05	4.32706	down
LOC157273	-1.05009	5.54406	-5.00694	2.18187e-06	1.32621e-05	4.29743	down
GNAL	1.00258	5.98366	4.98238	2.41906e-06	1.45331e-05	4.19806	up
ARMCX3	-1.13192	8.00384	-4.9816	2.427e-06	1.45764e-05	4.1949	down
COX7B2	1.77407	5.35146	4.96805	2.56889e-06	1.53509e-05	4.1402	up
CP	-1.03262	12.2552	-4.96628	2.58798e-06	1.54513e-05	4.13308	down
GNMT	-1.60173	9.80653	-4.95677	2.69305e-06	1.6017e-05	4.09477	down
SLC4A4	-1.29768	8.48576	-4.95645	2.69665e-06	1.60337e-05	4.09348	down
C8B	-1.121	11.1864	-4.94553	2.82273e-06	1.668e-05	4.04951	down
SMPX	1.30817	5.67708	4.92232	3.1098e-06	1.81426e-05	3.95631	up
PPARGC1A	-1.17379	8.19561	-4.90408	3.35512e-06	1.94501e-05	3.88327	down
SLC16A14	-1.10895	6.4314	-4.88115	3.69041e-06	2.12049e-05	3.79167	down
EGR3	-1.0256	6.08674	-4.85891	4.04652e-06	2.29633e-05	3.7031	down
HAL	-1.9208	10.0985	-4.79831	5.19499e-06	2.86271e-05	3.46304	down
SH3YL1	-1.0875	8.50639	-4.79601	5.24424e-06	2.88748e-05	3.45398	down
B3GNT5	1.05144	7.17887	4.78806	5.41813e-06	2.96945e-05	3.42265	up
RMST	1.1361	4.92645	4.78651	5.4528e-06	2.98278e-05	3.41653	up
MAGEA12	1.57872	4.96215	4.78502	5.48612e-06	3.00019e-05	3.41068	up
PPP1R1A	-1.46083	9.14515	-4.77245	5.77632e-06	3.14101e-05	3.36119	down
CYTIP	-1.06238	6.48216	-4.76638	5.92162e-06	3.20775e-05	3.33734	down
FAM133A	1.44739	5.36351	4.76582	5.93516e-06	3.21274e-05	3.33514	up
BHMT	-1.45405	11.7016	-4.75865	6.11169e-06	3.29407e-05	3.30701	down
EP300-AS1	-1.04312	7.38526	-4.75178	6.28571e-06	3.38154e-05	3.28006	down
TRIM22	-1.00225	9.25047	-4.74237	6.532e-06	3.50377e-05	3.24317	down
GREB1	1.20899	6.24103	4.7378	6.6547e-06	3.56303e-05	3.22531	up
REEP6	-1.09939	10.2642	-4.7347	6.73951e-06	3.60262e-05	3.21316	down
GEM	-1.18812	7.40763	-4.72674	6.96145e-06	3.71633e-05	3.18207	down
HSD17B2	-1.17756	10.179	-4.7264	6.97113e-06	3.72052e-05	3.18074	down
CDH1	-1.11032	10.1203	-4.7083	7.50387e-06	3.96706e-05	3.11009	down
MFAP3L	-1.33625	8.51143	-4.70621	7.56792e-06	3.99673e-05	3.10194	down
MLIP	-1.13002	8.12053	-4.70477	7.61206e-06	4.01479e-05	3.09636	down
XK	1.3831	5.17121	4.70358	7.64891e-06	4.02896e-05	3.09173	up
FNDC5	-1.31404	8.29509	-4.69402	7.95174e-06	4.16671e-05	3.05449	down
S100A8	-1.36588	7.93496	-4.69346	7.96969e-06	4.17395e-05	3.05233	down
MAGEA1	1.4243	6.40959	4.69222	8.00985e-06	4.19274e-05	3.04751	up
MYH4	1.02212	3.95198	4.68858	8.12902e-06	4.23978e-05	3.03335	up
TRIM71	1.34381	5.4037	4.67939	8.43716e-06	4.38576e-05	2.99767	up
MAGEA6	2.18846	5.66902	4.67311	8.65456e-06	4.4849e-05	2.97328	up
COL8A1	1.16572	5.61398	4.66119	9.08177e-06	4.67864e-05	2.92709	up
LINC01831	-1.11918	6.49863	-4.66087	9.09345e-06	4.68346e-05	2.92586	down
ETNPPL	-1.59824	10.2728	-4.64913	9.53466e-06	4.88451e-05	2.88045	down
COL4A3	-1.02732	5.62992	-4.64895	9.54165e-06	4.88639e-05	2.87975	down
PCDHB14	1.0636	5.07674	4.64127	9.84161e-06	5.02772e-05	2.85009	up
INHBE	-1.36007	9.31574	-4.63964	9.90646e-06	5.05573e-05	2.84379	down
SLC22A7	-1.51529	10.7214	-4.61969	1.07341e-05	5.44093e-05	2.76692	down
SPARCL1	1.07469	9.66195	4.61959	1.07385e-05	5.44179e-05	2.76653	up
CFHR4	-1.54737	11.0836	-4.59434	1.1883e-05	5.95596e-05	2.66954	down
ITIH4	-1.09546	12.1937	-4.58244	1.24625e-05	6.21244e-05	2.62395	down
FAM169A	1.01099	8.11993	4.57565	1.28053e-05	6.36291e-05	2.59797	up
PWWP3B	-1.09762	5.46025	-4.57318	1.29325e-05	6.41977e-05	2.58852	down
ARHGEF26	-1.00104	9.1784	-4.5721	1.29882e-05	6.44056e-05	2.5844	down
CYP2C8	-1.69561	12.2285	-4.55934	1.36668e-05	6.74409e-05	2.53566	down
COL14A1	-1.2827	6.65732	-4.53382	1.51272e-05	7.3821e-05	2.43852	down
PDZRN3	-1.06989	5.1693	-4.52918	1.54088e-05	7.50319e-05	2.42088	down
PIGR	-1.39711	9.43318	-4.52686	1.55515e-05	7.56718e-05	2.41206	down
DMGDH	-1.20258	9.06427	-4.52116	1.59069e-05	7.71326e-05	2.39045	down
ADH1A	-1.40173	12.1042	-4.51951	1.60116e-05	7.75569e-05	2.38418	down
SLC7A11	1.23573	6.0079	4.51838	1.60837e-05	7.783e-05	2.37988	up
CXCL6	-1.65204	5.98675	-4.50618	1.68797e-05	8.11592e-05	2.33369	down
HPGD	-1.7742	9.15159	-4.50346	1.70628e-05	8.19386e-05	2.32338	down
SLC27A2	-1.15797	10.2384	-4.4884	1.8109e-05	8.63666e-05	2.26649	down
LINC02241	1.00252	4.33146	4.47837	1.88403e-05	8.96215e-05	2.22865	up
RGS2	-1.20775	9.31648	-4.47366	1.91935e-05	9.1044e-05	2.2109	down
EHHADH	-1.02992	10.6762	-4.47339	1.92143e-05	9.11212e-05	2.20986	down
ACSM5	-1.05433	10.13	-4.47109	1.93887e-05	9.18401e-05	2.20123	down
SLCO4C1	-1.10598	5.5582	-4.46642	1.97489e-05	9.32616e-05	2.18364	down
SLCO1B1	-1.0297	9.60129	-4.44429	2.15439e-05	0.000100399	2.10054	down
CTNNA2	1.16821	5.59589	4.41712	2.39641e-05	0.000110402	1.99887	up
FZD6	1.08153	6.20778	4.41535	2.41302e-05	0.000110965	1.99228	up
HAO1	-1.2247	10.9783	-4.41306	2.43478e-05	0.000111864	1.98371	down
F9	-1.53246	11.9819	-4.40858	2.47774e-05	0.000113658	1.96702	down
NQO1	1.44052	7.23625	4.39574	2.6051e-05	0.000118904	1.91917	up
SLC13A5	-1.3732	9.78129	-4.3893	2.67128e-05	0.000121457	1.89524	down
MROH2A	-1.06259	6.34598	-4.36477	2.93861e-05	0.000132329	1.80425	down
PFKFB3	-1.00413	8.516	-4.36071	2.98536e-05	0.000134195	1.7892	down
DSEL	-1.03811	5.89735	-4.35716	3.02668e-05	0.000135901	1.77609	down
ASPN	-1.23927	8.47541	-4.35362	3.06852e-05	0.000137565	1.763	down
LUM	-2.01648	8.08667	-4.34935	3.11976e-05	0.000139738	1.74721	down
ACMSD	-1.08395	9.92259	-4.34004	3.23419e-05	0.000144319	1.71286	down
UNC93A	-1.1686	7.65067	-4.31667	3.53969e-05	0.000156326	1.62683	down
PAGE4	1.44055	5.98387	4.31546	3.55627e-05	0.000156968	1.62238	up
FGFR2	-1.42193	8.68071	-4.30021	3.77145e-05	0.000165619	1.56641	down
DPYS	-1.2883	11.5326	-4.27701	4.12288e-05	0.000179179	1.48156	down
SLC10A1	-1.4885	10.8856	-4.27571	4.1434e-05	0.000179916	1.47684	down
FHL2	-1.00799	7.9058	-4.26975	4.23922e-05	0.000183406	1.45507	down
CLGN	1.30944	5.89462	4.26536	4.31106e-05	0.000185916	1.43907	up
A1BG	-1.11727	12.307	-4.26149	4.37535e-05	0.000188205	1.42498	down
C12orf75	1.03164	7.01878	4.258	4.43408e-05	0.000190245	1.41229	up
ZNF595	1.23328	4.96093	4.24271	4.70066e-05	0.000200023	1.35673	up
UGT2A3	-1.0805	7.12226	-4.24037	4.7429e-05	0.000201651	1.34822	down
TOX3	1.09946	8.01022	4.23762	4.79292e-05	0.000203563	1.33824	up
PPM1E	1.00299	5.14917	4.22061	5.11354e-05	0.000215367	1.27664	up
PEG10	2.03272	8.28179	4.19316	5.67478e-05	0.000236422	1.17762	up
EPHA3	-1.14243	5.63217	-4.18991	5.74505e-05	0.000238921	1.16592	down
LYZ	1.09849	11.1612	4.18646	5.82048e-05	0.000241709	1.15353	up
FETUB	-1.5224	8.78165	-4.16923	6.21215e-05	0.000256182	1.09164	down
GDA	-1.06593	9.43731	-4.16702	6.26397e-05	0.000258054	1.08375	down
UGT3A1	-1.19413	9.21343	-4.13979	6.94024e-05	0.000282113	0.986376	down
PKHD1	-1.01258	6.07395	-4.11588	7.59118e-05	0.000305069	0.901276	down
CXCL11	1.14834	5.14677	4.08558	8.50015e-05	0.000338162	0.793983	up
ADH1C	-1.47354	11.6651	-4.08154	8.62901e-05	0.000342883	0.779714	down
ACSM1	1.03893	6.52365	4.06876	9.04906e-05	0.000357322	0.734648	up
PDZK1IP1	1.38053	6.81488	4.06834	9.06327e-05	0.000357743	0.733159	up
OTC	-1.40772	9.58632	-4.05811	9.41398e-05	0.000369778	0.697172	down
LOX	1.00007	5.32776	4.04776	9.78207e-05	0.000382745	0.660824	up
ITGB8	-1.16807	4.62163	-4.04589	9.85e-05	0.000384955	0.654266	down
MTTP	-1.05554	10.607	-4.00143	0.000116053	0.000446036	0.498964	down
GTSF1	1.15674	6.44937	3.9803	0.00012541	0.000478083	0.425584	up
DIO1	-1.2984	10.5352	-3.95566	0.000137231	0.000518741	0.340384	down
NRCAM	1.18684	6.06624	3.9522	0.000138975	0.000524151	0.328445	up
PCK1	-1.47161	11.8711	-3.94629	0.000142001	0.000534067	0.30808	down
REG3A	1.99701	6.45644	3.94565	0.000142332	0.000535009	0.305885	up
CYP8B1	-1.49501	10.9423	-3.94067	0.000144935	0.000543276	0.288753	down
S100P	1.63645	7.02287	3.93638	0.000147215	0.000550594	0.274002	up
PTGDS	-1.06825	9.28691	-3.89122	0.000173382	0.000637587	0.119469	down
HPD	-1.7277	11.4611	-3.87208	0.000185768	0.000677579	0.0543421	down
LOC100505985	-1.04725	6.95467	-3.85434	0.000197987	0.000717864	-0.00575049	down
TNFRSF19	1.29223	6.00661	3.82817	0.000217435	0.000779829	-0.0940897	up
SLC51A	-1.18222	9.44434	-3.82734	0.000218076	0.000781573	-0.0968649	down
ADGRG2	1.00189	5.89734	3.80773	0.000233863	0.000833857	-0.162719	up
DKK1	1.70465	5.81591	3.74466	0.00029236	0.00101849	-0.372833	up
ALDH3A1	1.38025	6.42561	3.71345	0.0003262	0.0011207	-0.475778	up
CPS1	-1.26232	12.5135	-3.68718	0.000357543	0.00121493	-0.56194	down
FABP1	-1.30807	12.403	-3.64012	0.000420934	0.00140085	-0.715067	down
SLC26A3	1.05849	4.30999	3.61248	0.000462993	0.00152522	-0.804314	up
CYP2E1	-1.27002	13.2312	-3.60381	0.000476982	0.0015644	-0.832191	down
SERPINA7	-1.12797	10.5707	-3.59843	0.000485873	0.00158969	-0.849486	down
LGSN	-1.11642	5.37638	-3.55067	0.000571861	0.00183581	-1.00194	down
NR1I3	-1.03878	8.90415	-3.51591	0.000643273	0.00203054	-1.11189	down
APCS	-1.03902	12.5043	-3.47717	0.000732763	0.00227813	-1.23344	down
MMP12	1.19438	5.15871	3.42833	0.000862301	0.00263098	-1.38513	up
DEFB1	-1.24695	10.3679	-3.40864	0.000920389	0.00279049	-1.4458	down
ADH1B	-1.12982	12.6199	-3.40049	0.000945483	0.00285755	-1.47083	down
RELN	-1.09249	9.2528	-3.37609	0.00102453	0.00307435	-1.54548	down
DCAF4L2	1.08798	4.04677	3.3581	0.00108673	0.00323301	-1.60023	up
SULT2A1	-1.06519	11.3572	-3.35419	0.00110071	0.0032694	-1.6121	down
AKR1C4	-1.01607	10.8247	-3.31951	0.00123233	0.00361223	-1.71691	down
C15orf48	1.00444	6.31067	3.26689	0.0014604	0.00419269	-1.87421	up
PON1	-1.09235	11.8249	-3.22694	0.0016593	0.00469558	-1.99229	down
RTP3	-1.05877	8.83491	-3.20313	0.00178958	0.00501429	-2.06208	down
ARG1	-1.0279	12.1497	-3.142	0.00216902	0.00592441	-2.23935	down
NPW	-1.04719	6.01503	-3.00802	0.00327606	0.008529	-2.61782	down
HSD11B1	-1.0642	11.25	-2.94634	0.00394431	0.0100091	-2.7874	down
CRP	-1.48627	10.0836	-2.92831	0.00416225	0.0104739	-2.83642	down
PEG3	-1.05022	6.75637	-2.90489	0.00446171	0.0111193	-2.89969	down
